# Supplementary material for: Modeling the reactivity of ozone and sulphate radicals towards organic chemicals in water using machine learning approaches
Source: Royal Society of Chemistry journal article supplement (doi:10.1039/c6ra22865h), 2016-01-01
Supplement: c6ra22865h1.pdf [file c6ra22865h1.pdf]

## Supplementary Information

### Modeling the reactivity of ozone and sulphate radicals towards organic chemicals in water using machine learning approaches

Shikha Gupta<sup>1a</sup>, Nikita Basant<sup>\*2</sup>

<sup>1</sup>CSIR-Indian Institute of Toxicology Research,  
Post Box 80, Mahatma Gandhi Marg, Lucknow-226 001, India

<sup>2</sup>ETRC, Gomtinagar, Lucknow-226010, India

(<sup>a</sup>Current address: CSIR-NBRI, Lucknow)

\*Author for all correspondence : [nikita\\_basant@yahoo.com](mailto:nikita_basant@yahoo.com)

**Table S1a:** List of references for ozone data

| S.No. | Ozone data Reference                                                                                                      |
|-------|---------------------------------------------------------------------------------------------------------------------------|
| 1     | J.L. Acero, F. Javier Benitez, F.J. Real, and C. Maya, <i>Ind. Eng. Chem. Res.</i> , 2003, <b>42</b> , 5762–5769.         |
| 2     | F.J. Benitez, J. Beltran-Heredia, and T. Gonzalez, <i>Ozone Sci. Eng.</i> , 1994, <b>16</b> , 213–234.                    |
| 3     | J. Benner, E. Salhi, T. Ternes, and U. von Gunten, <i>Water Res.</i> 2008, <b>42</b> , 3003–3012.                         |
| 4     | V. Butkovic, L. Klasinc, M. Orhanovic, J. Turk, and H. Gusten, <i>Environ. Sci. Technol.</i> , 1983, <b>17</b> , 546–548. |
| 5     | P. Cheme-Ayala, M.G. El-Din, and D.W. Smith, <i>Chemosphere</i> , 2010, <b>78</b> , 557–562.                              |
| 6     | M. Deborde, S. Rabouan, J.P. Duguet, and B. Legube, <i>Environ. Sci. Technol.</i> , 2005, <b>39</b> , 6086–6092.          |
| 7     | M.C. Dodd, M.O. Buffle, and U. von Gunten, <i>Environ. Sci. Technol.</i> , 2006, <b>40</b> , 1969–1977.                   |
| 8     | M.M. Huber, S. Canonica, G.Y. Park, and U. von Gunten, <i>Environ. Sci. Technol.</i> , 2003, <b>37</b> , 1016–1024.       |
| 9     | X. Jin, S. Peldszus, and P.M. Huck, <i>Water Res.</i> , 2012, <b>46</b> , 6519–6530.                                      |
| 10    | C.C.D. Yao, and W.R. Haag, <i>Water Res.</i> , 1991, <b>25</b> , 761–773.                                                 |
| 11    | J. Hoigne, and H. Bader, <i>Water Res.</i> , 1983, <b>17</b> , 185-194.                                                   |
| 12    | J. Hoigne, and H. Bader, <i>Water Res.</i> , 1983, <b>17</b> , 173-183.                                                   |
| 13    | J. Hoigne, H. Bader, W. Haag, and J. Staehelin, <i>Water Res.</i> , 1985, <b>19</b> , 993-1004.                           |
| 14    | A. Peter, and U. Von Gunten, <i>Environ. Sci. Technol.</i> , 2007, <b>41</b> , 626-631.                                   |

**Table S1b:** List of references for sulphate radical data

---

| <b>S.No.</b> | <b>Sulphate data reference</b>                                                                                                                                             |
|--------------|----------------------------------------------------------------------------------------------------------------------------------------------------------------------------|
| 1            | X. He, S.P. Mezyk, I. Michael, D. Fatta-Kassinos, and D.D. Dionysiou, <i>J. Hazard. Mater.</i> , 2014, <b>279</b> , 375–383.                                               |
| 2            | I. Grgic, B. Podkrajsek, P. Barzaghi, and H. Herrmann, <i>Atmos. Environ.</i> , 2007, <b>41</b> , 9187–9194.                                                               |
| 3            | S. Padmaja, Z.B. Alfassi, P. Neta, and R.E. Huie, <i>Int. J. Chem. Kinet.</i> , 1993, <b>25</b> , 193–198.                                                                 |
| 4            | A.B. Ross, and P. Neta, Rate constants for reactions of inorganic radicals in aqueous solution. In Commerce, Ed; National Bureau of Standards: Washington, DC, U.S., 1979. |
| 5            | M. Bonifacic, and K.D. Asmus, <i>J. Phys. Chem.</i> , 1976, <b>80</b> , 2426–2430.                                                                                         |
| 6            | C.L. Clifton, and R.E. Huie, <i>Int. J. Chem. Kinet.</i> , 1989, <b>21</b> , 677–687.                                                                                      |
| 7            | L. Dogliotti, and E. Hayon, <i>J. Phys. Chem.</i> 1967, <b>71</b> , 2511–2516.                                                                                             |
| 8            | C. George, H. El Rassy, and J.M. Chovelon, <i>Int. J. Chem. Kinet.</i> , 2001, <b>33</b> , 539–547.                                                                        |
| 9            | H. Herrmann, H.W. Jacobi, G. Raabe, A. Reese, and R. Zellner, <i>Anal. Bioanal. Chem.</i> , 1996, <b>355</b> , 343–344.                                                    |
| 10           | R.E. Huie, C.L. Clifton, and S.A. Kafafi, <i>J. Phys. Chem.</i> , 1991, <b>95</b> , 9336–9340.                                                                             |
| 11           | I. Kraljić, <i>Int. J. Radiat. Phys. Chem.</i> , 1970, <b>2</b> , 59–68.                                                                                                   |
| 12           | P. Maruthamuthu, and P. Neta, <i>J. Phys. Chem.</i> , 1977, <b>81</b> , 1622–1625.                                                                                         |
| 13           | P.G. Tratnyek, T.J. Grundl, and S.B. Haderlein, Aquatic Redox Chemistry; American Chemical Society: Washington, DC, 2011.                                                  |
| 14           | P. Neta, R.E. Huie, and A.B. Ross, <i>J. Phys. Chem. Ref. Data</i> , 1990, <b>19</b> , 413–513.                                                                            |
| 15           | P. O'Neill, S. Steenken, and D. Schulte-Frohlinde, <i>J. Phys. Chem.</i> , 1975, <b>79</b> , 2773–2779.                                                                    |
| 16           | J. Paul, D.B. Naik, Y.K. Bhardwaj, and L. Varshney, <i>Radiat. Phys. Chem.</i> , 2014, <b>100</b> , 38–44.                                                                 |
| 17           | J.L. Redpath, and R.L. Willson, <i>Int. J. Radiat. Biol.</i> , 1975, <b>27</b> , 389–398.                                                                                  |
| 18           | S. Steenken, P. O'Neill, and D. Schulte-Frohlinde, <i>J. Phys. Chem.</i> , 1977, <b>81</b> , 26–30.                                                                        |
| 19           | M.M. Ahmed, S. Barbati, P. Doumenq, and S. Chiron, <i>Chem. Eng. J.</i> 2012, <b>197</b> , 440–447.                                                                        |

---

**Table S2:** Data set used in QSRR modeling

| <b>S.No.</b> | <b>Compound</b>               | <b>logk</b><br>(experimental) | <b>Dependent variable</b> |
|--------------|-------------------------------|-------------------------------|---------------------------|
| 1            | Equilenin                     | 7.000                         | log k <sub>03</sub>       |
| 2            | Butylated hydroxyanisole      | 6.520                         | log k <sub>03</sub>       |
| 3            | Fenoterol                     | 6.450                         | log k <sub>03</sub>       |
| 4            | Tetracycline                  | 6.400                         | log k <sub>03</sub>       |
| 5            | Triclosan                     | 6.400                         | log k <sub>03</sub>       |
| 6            | Phenol                        | 6.260                         | log k <sub>03</sub>       |
| 7            | 17 $\alpha$ -Ethinylestradiol | 6.260                         | log k <sub>03</sub>       |
| 8            | Gemfibrozil                   | 5.690                         | log k <sub>03</sub>       |
| 9            | Methicillin                   | 4.590                         | log k <sub>03</sub>       |
| 10           | Benzo[a]pyrene                | 3.880                         | log k <sub>03</sub>       |
| 11           | Clofibric acid                | 3.700                         | log k <sub>03</sub>       |
| 12           | Trifluralin                   | 3.280                         | log k <sub>03</sub>       |
| 13           | Methoxychlor                  | 2.400                         | log k <sub>03</sub>       |
| 14           | Tri(2-butoxyethyl)phosphate   | 0.660                         | log k <sub>03</sub>       |
| 15           | Butylbenzyl phthalate         | 0.150                         | log k <sub>03</sub>       |
| 16           | Metformin                     | 0.080                         | log k <sub>03</sub>       |
| 17           | Tris(chloroethyl)phosphate    | -0.100                        | log k <sub>03</sub>       |
| 18           | Iomeprol                      | -0.700                        | log k <sub>03</sub>       |
| 19           | Dicamba                       | -1.000                        | log k <sub>03</sub>       |
| 20           | Dicofol                       | -1.000                        | log k <sub>03</sub>       |
| 21           | Di(2-ethylhexyl)phthalate     | -1.000                        | log k <sub>03</sub>       |
| 22           | Hexachlorobenzene             | -2.000                        | log k <sub>03</sub>       |
| 23           | Bisphenol A                   | 6.430                         | log k <sub>03</sub>       |
| 24           | Sulfamethoxazole              | 6.300                         | log k <sub>03</sub>       |
| 25           | Estrone                       | 6.260                         | log k <sub>03</sub>       |
| 26           | 17 beta-Estradiol             | 6.230                         | log k <sub>03</sub>       |
| 27           | Estriol                       | 6.220                         | log k <sub>03</sub>       |
| 28           | Amoxicillin                   | 6.180                         | log k <sub>03</sub>       |
| 29           | 4-Nonylphenol                 | 6.150                         | log k <sub>03</sub>       |
| 30           | Lincomycin                    | 5.830                         | log k <sub>03</sub>       |
| 31           | Carbamazepine                 | 5.480                         | log k <sub>03</sub>       |
| 32           | Trimethoprim                  | 5.430                         | log k <sub>03</sub>       |
| 33           | Naproxen                      | 5.410                         | log k <sub>03</sub>       |
| 34           | Enrofloxacin                  | 5.180                         | log k <sub>03</sub>       |
| 35           | Pyrene                        | 4.560                         | log k <sub>03</sub>       |
| 36           | Ciprofloxacin                 | 4.280                         | log k <sub>03</sub>       |
| 37           | Phenantlene                   | 4.200                         | log k <sub>03</sub>       |
| 38           | Penicillin G                  | 3.680                         | log k <sub>03</sub>       |
| 39           | Metoprolol                    | 3.226                         | log k <sub>03</sub>       |

|    |                               |        |                      |
|----|-------------------------------|--------|----------------------|
| 40 | Bromoxynil                    | 3.060  | log k <sub>03</sub>  |
| 41 | Bezafibrate                   | 2.770  | log k <sub>03</sub>  |
| 42 | Ibuprofen                     | 0.980  | log k <sub>03</sub>  |
| 43 | Alachlor                      | 0.580  | log k <sub>03</sub>  |
| 44 | Diazepam                      | -0.120 | log k <sub>03</sub>  |
| 45 | Dimethyl phthalate            | -0.700 | log k <sub>03</sub>  |
| 46 | Diethylphthalate              | -0.850 | log k <sub>03</sub>  |
| 47 | Gamma-HCH                     | -1.400 | log k <sub>03</sub>  |
| 48 | 2,4-D                         | 0.360  | log k <sub>03</sub>  |
| 49 | Atrazine                      | 0.780  | log k <sub>03</sub>  |
| 50 | Simazine                      | 0.680  | log k <sub>03</sub>  |
| 51 | Acetochlor                    | 0.380  | log k <sub>03</sub>  |
| 52 | Cyanazine                     | 0.870  | log k <sub>03</sub>  |
| 53 | Iopromide                     | -0.100 | log k <sub>03</sub>  |
| 54 | Metolachlor                   | 0.040  | log k <sub>03</sub>  |
| 55 | Propachlor                    | -0.050 | log k <sub>03</sub>  |
| 56 | Dalapon                       | -3.301 | log k <sub>03</sub>  |
| 57 | Propionic acid                | -2.699 | log k <sub>03</sub>  |
| 58 | Adipic acid monoethyl ester   | -2.523 | log k <sub>03</sub>  |
| 59 | Succinic acid                 | -2.523 | log k <sub>03</sub>  |
| 60 | Tert-butanol                  | -2.523 | log k <sub>03</sub>  |
| 61 | Methanol                      | -1.620 | log k <sub>03</sub>  |
| 62 | Cyanic acid                   | -2.000 | log k <sub>03</sub>  |
| 63 | Glyoxylic acid                | 0.279  | log k <sub>03</sub>  |
| 64 | Propan-2-ol                   | 0.279  | log k <sub>03</sub>  |
| 65 | Endothall                     | 0.301  | log k <sub>03</sub>  |
| 66 | Pyridine                      | 0.477  | log k <sub>03</sub>  |
| 67 | Octanal                       | 0.903  | log k <sub>03</sub>  |
| 68 | Fenoprop                      | 0.949  | log k <sub>03</sub>  |
| 69 | Nitrosodimethylamine          | 1.000  | log k <sub>03</sub>  |
| 70 | 2-isopropyl-3-methoxypyrazine | 1.701  | log k <sub>03</sub>  |
| 71 | Picloram                      | 2.000  | log k <sub>03</sub>  |
| 72 | Methylamine                   | 2.447  | log k <sub>03</sub>  |
| 73 | Beta-alanine                  | 2.491  | log k <sub>03</sub>  |
| 74 | 1-phenoxy-2-propanol          | 2.505  | log k <sub>03</sub>  |
| 75 | Oxamyl                        | 2.792  | log k <sub>03</sub>  |
| 76 | Alpha-alanine                 | 2.806  | log k <sub>03</sub>  |
| 77 | Atenolol                      | 3.230  | log k <sub>03</sub>  |
| 78 | Beta-cyclocitral              | 3.590  | log k <sub>03</sub>  |
| 79 | Dimethylamine                 | 3.903  | log k <sub>03</sub>  |
| 80 | Trimethylamine                | 5.097  | log k <sub>03</sub>  |
| 81 | Propanolol                    | 5.000  | log k <sub>03</sub>  |
| 82 | 1,1-dimethylguanidine         | 8.663  | log k <sub>SO4</sub> |

|     |                             |       |               |
|-----|-----------------------------|-------|---------------|
| 83  | 1,3,5-trimethoxy-benzene    | 9.255 | log $k_{SO4}$ |
| 84  | 1,3-dimethoxy-benzene       | 9.845 | log $k_{SO4}$ |
| 85  | 1,4-dimethoxy-benzene       | 9.857 | log $k_{SO4}$ |
| 86  | 1,4-dioxane                 | 7.612 | log $k_{SO4}$ |
| 87  | 1-heptanol                  | 8.398 | log $k_{SO4}$ |
| 88  | 1-hexanol                   | 8.204 | log $k_{SO4}$ |
| 89  | 1-octanol                   | 8.505 | log $k_{SO4}$ |
| 90  | 1-pentanol                  | 8.114 | log $k_{SO4}$ |
| 91  | 1-propanol                  | 7.728 | log $k_{SO4}$ |
| 92  | 2,3,4-trimethoxy-benzoate   | 9.398 | log $k_{SO4}$ |
| 93  | 2,3-dimethyl-2,3-butanediol | 8.415 | log $k_{SO4}$ |
| 94  | 2,4,6-trimethoxy-benzoate   | 9.415 | log $k_{SO4}$ |
| 95  | 2-methoxybenzoate           | 9.845 | log $k_{SO4}$ |
| 96  | 2-propanol                  | 7.922 | log $k_{SO4}$ |
| 97  | 3,5-dimethoxy-benzoate      | 9.643 | log $k_{SO4}$ |
| 98  | 3-methoxybenzoate           | 9.881 | log $k_{SO4}$ |
| 99  | acetanilide                 | 9.556 | log $k_{SO4}$ |
| 100 | acetate                     | 6.672 | log $k_{SO4}$ |
| 101 | amoxicillin                 | 9.462 | log $k_{SO4}$ |
| 102 | ampicillin                  | 9.301 | log $k_{SO4}$ |
| 103 | anisole                     | 9.690 | log $k_{SO4}$ |
| 104 | benzene                     | 8.826 | log $k_{SO4}$ |
| 105 | benzoic acid                | 9.079 | log $k_{SO4}$ |
| 106 | carboxyformate              | 6.230 | log $k_{SO4}$ |
| 107 | cephalothin                 | 9.542 | log $k_{SO4}$ |
| 108 | cyclopentanol               | 8.447 | log $k_{SO4}$ |
| 109 | diclofenac                  | 9.964 | log $k_{SO4}$ |
| 110 | dimethyl disulfide          | 8.580 | log $k_{SO4}$ |
| 111 | dipropyl ether              | 8.342 | log $k_{SO4}$ |
| 112 | estradiol                   | 9.083 | log $k_{SO4}$ |
| 113 | ethanol                     | 7.720 | log $k_{SO4}$ |
| 114 | ethinylestradiol            | 9.479 | log $k_{SO4}$ |
| 115 | formic acid                 | 5.699 | log $k_{SO4}$ |
| 116 | fumarate                    | 7.204 | log $k_{SO4}$ |
| 117 | glycine                     | 6.954 | log $k_{SO4}$ |
| 118 | glycolate                   | 7.204 | log $k_{SO4}$ |
| 119 | ibuprofen                   | 9.580 | log $k_{SO4}$ |
| 120 | isoborneol                  | 8.723 | log $k_{SO4}$ |
| 121 | lactate                     | 7.204 | log $k_{SO4}$ |
| 122 | lactic acid                 | 7.000 | log $k_{SO4}$ |
| 123 | malate                      | 7.176 | log $k_{SO4}$ |
| 124 | malic acid                  | 6.886 | log $k_{SO4}$ |
| 125 | malonic acid                | 6.431 | log $k_{SO4}$ |

|     |                          |       |               |
|-----|--------------------------|-------|---------------|
| 126 | mesitylene               | 9.114 | log $k_{SO4}$ |
| 127 | methanol                 | 7.021 | log $k_{SO4}$ |
| 128 | methionine               | 9.041 | log $k_{SO4}$ |
| 129 | m-toluic acid            | 9.301 | log $k_{SO4}$ |
| 130 | o-bromobenzoic acid      | 8.940 | log $k_{SO4}$ |
| 131 | oxetane                  | 8.053 | log $k_{SO4}$ |
| 132 | p-bromobenzoic acid      | 9.000 | log $k_{SO4}$ |
| 133 | p-chlorobenzoic acid     | 8.556 | log $k_{SO4}$ |
| 134 | p-cresol                 | 9.447 | log $k_{SO4}$ |
| 135 | penicillinV              | 9.378 | log $k_{SO4}$ |
| 136 | p-hydroxybenzoic acid    | 9.398 | log $k_{SO4}$ |
| 137 | piperacillin             | 9.079 | log $k_{SO4}$ |
| 138 | p-methoxybenzoic acid    | 9.544 | log $k_{SO4}$ |
| 139 | progesterone             | 9.076 | log $k_{SO4}$ |
| 140 | p-toluic acid            | 9.255 | log $k_{SO4}$ |
| 141 | serine                   | 7.362 | log $k_{SO4}$ |
| 142 | succinic acid            | 6.851 | log $k_{SO4}$ |
| 143 | terephthalic acid        | 8.230 | log $k_{SO4}$ |
| 144 | tetrahydrofuran          | 8.369 | log $k_{SO4}$ |
| 145 | tetrahydropyran          | 8.057 | log $k_{SO4}$ |
| 146 | tyrosine                 | 9.505 | log $k_{SO4}$ |
| 147 | 1,2,4-trimethoxy-benzene | 9.892 | log $k_{SO4}$ |
| 148 | 1,2-dimethoxy-benzene    | 9.699 | log $k_{SO4}$ |
| 149 | 1,3-dioxane              | 7.535 | log $k_{SO4}$ |
| 150 | 1-butanol                | 7.903 | log $k_{SO4}$ |
| 151 | 2,6-dimethoxy-benzoate   | 9.398 | log $k_{SO4}$ |
| 152 | 3-pentanol               | 8.204 | log $k_{SO4}$ |
| 153 | diethyl ether            | 8.114 | log $k_{SO4}$ |
| 154 | formaldehyde             | 7.041 | log $k_{SO4}$ |
| 155 | glycolic acid            | 6.623 | log $k_{SO4}$ |
| 156 | histidine                | 9.398 | log $k_{SO4}$ |
| 157 | hydrogen malate          | 6.929 | log $k_{SO4}$ |
| 158 | o-toluic acid            | 9.146 | log $k_{SO4}$ |
| 159 | oxalic acid              | 6.041 | log $k_{SO4}$ |
| 160 | oxepane                  | 8.342 | log $k_{SO4}$ |
| 161 | penicillinG              | 9.146 | log $k_{SO4}$ |
| 162 | p-nitrosodimethylaniline | 9.362 | log $k_{SO4}$ |
| 163 | p-xylene                 | 9.431 | log $k_{SO4}$ |
| 164 | ticarcillin              | 8.903 | log $k_{SO4}$ |
| 165 | toluene                  | 9.114 | log $k_{SO4}$ |
| 166 | tryptophan               | 9.362 | log $k_{SO4}$ |

---

**Table S3a:** Correlation matrix of selected descriptors in  $\log k_{O_3}$  data set

| Descriptors | AMR   | nX    | minHBa | MDEC-24 |
|-------------|-------|-------|--------|---------|
| AMR         | 1.00  |       |        |         |
| nX          | 0.20  | 1.00  |        |         |
| minHBa      | -0.29 | -0.37 | 1.00   |         |
| MDEC-24     | 0.30  | 0.07  | 0.31   | 1.00    |

**Table S3b:** Correlation matrix of selected descriptors in  $\log k_{SO_4}$  data set

| Descriptors | AMR   | SssO  | meanI |
|-------------|-------|-------|-------|
| AMR         | 1.00  |       |       |
| SssO        | 0.10  | 1.00  |       |
| meanI       | -0.37 | -0.27 | 1.00  |

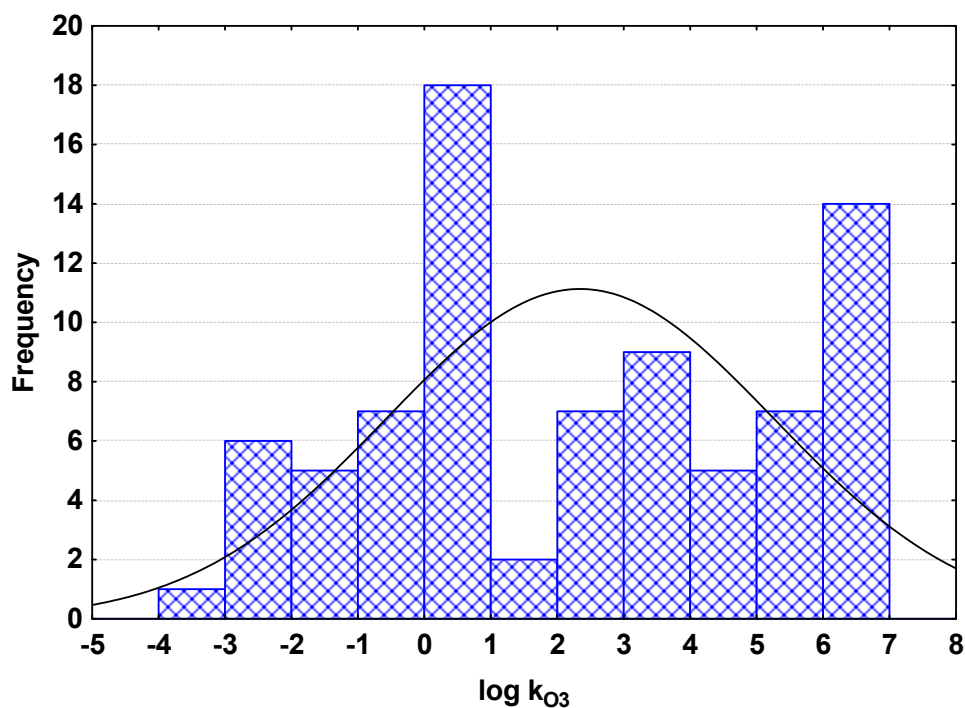

**Figure S1a:** Histogram of  $\log k_{O_3}$  values

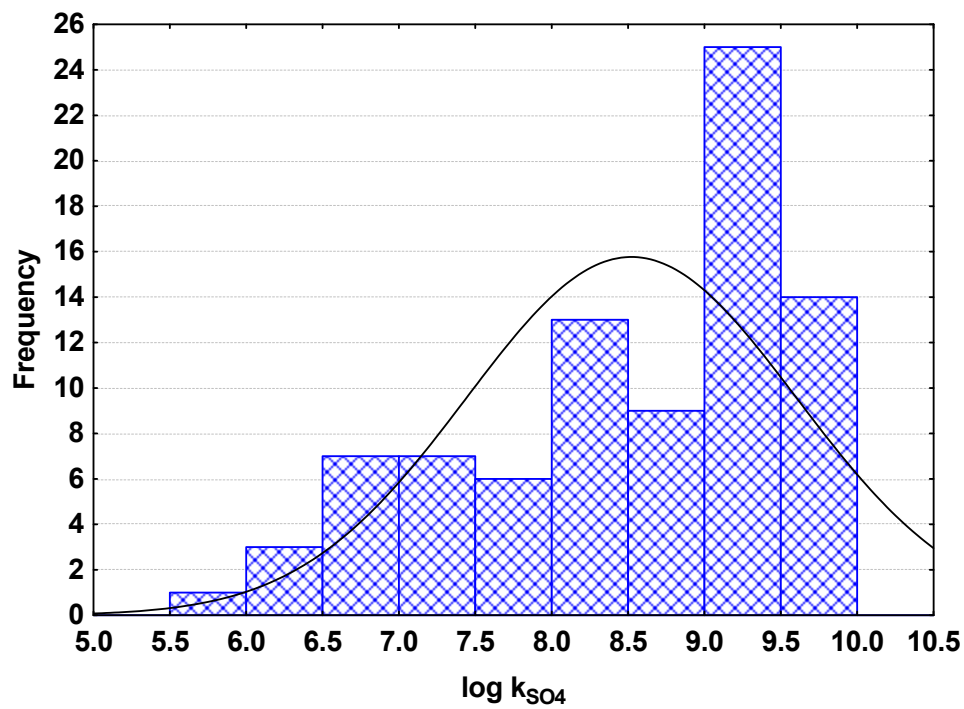

Figure S1b: Histogram of  $\log k_{SO_4}$  values

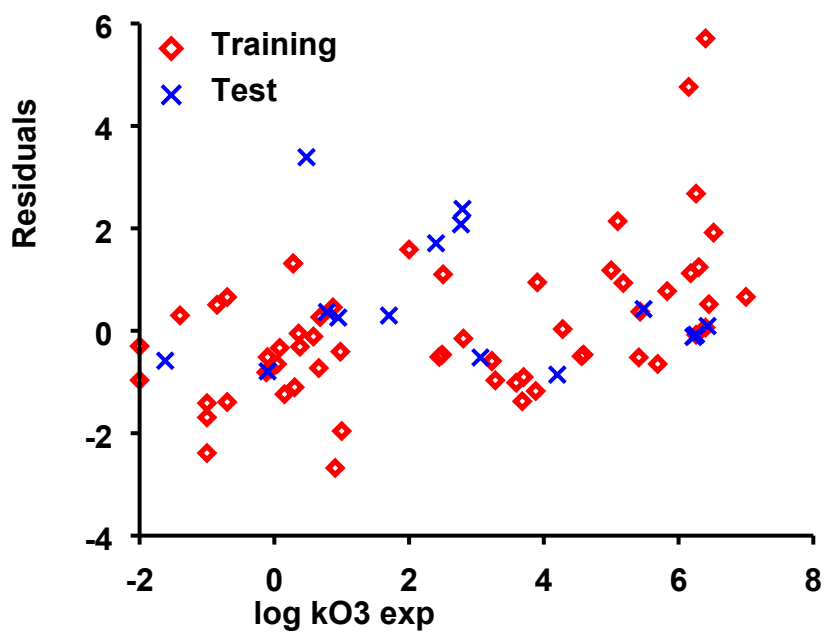

Figure S2a: Plot showing the distribution of experimental and residual values of  $\log k_{O_3}$  in training and test sets by SDT-QSRR model



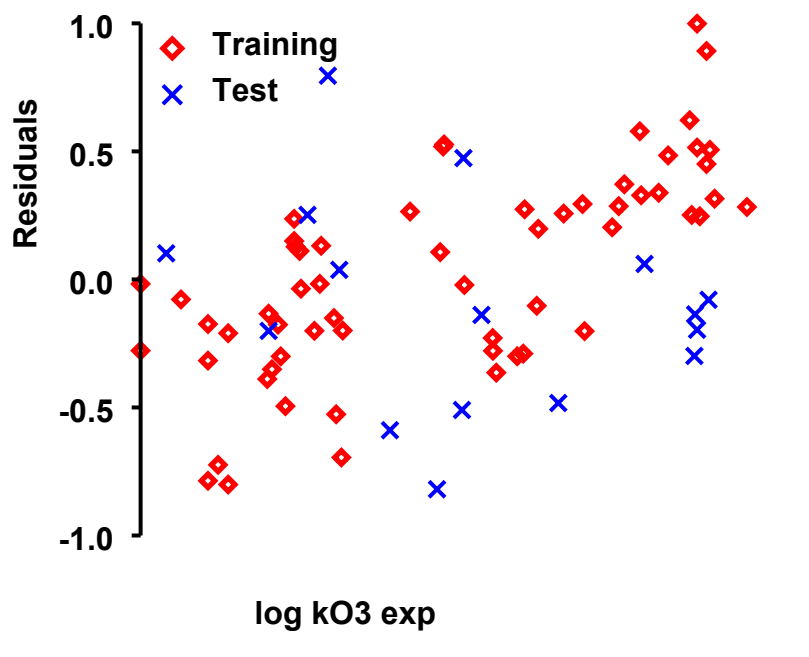

**Figure S2b:** Plot showing the distribution of experimental and residual values of  $\log k_{O_3}$  in training and test sets by DTB-QSRR model

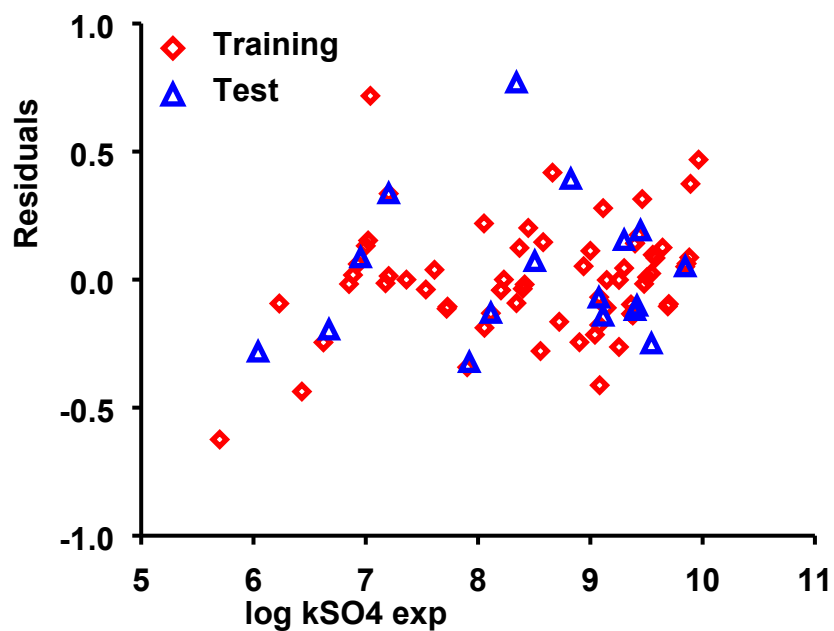

**Figure S3a:** Plot showing the distribution of experimental and residual values of  $\log k_{SO_4}$  in training and test sets by SDT-QSRR model

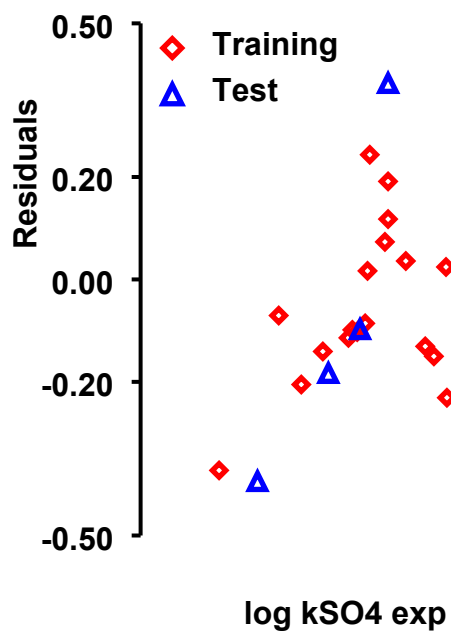

**Figure S3b:** Plot showing the distribution of experimental and residual values of  $\log k_{\text{SO}_4}$  in training and test sets by DTB-QSRR model
